# Supplementary material
Source: publisher figshare collection journal article supplement (https://acs.figshare.com/ndownloader/files/4179112)
Supplement: Supplementary file 1 [file 4179112]

# Supporting Information

## Solution pH that minimizes self-association of three monoclonal antibodies is strongly dependent on ionic strength

*Shantanu V. Sule,<sup>†</sup> Jason K. Cheung,<sup>‡</sup> Valentyn Antochshuk,<sup>‡</sup> Amardeep S. Bhalla,<sup>‡</sup> Chakravarthy Narasimhan,<sup>‡</sup> Steven Blaisdell,<sup>±</sup> Mohammed Shameem<sup>‡</sup> and Peter M. Tessier<sup>‡,\*</sup>*

<sup>†</sup>Center for Biotechnology & Interdisciplinary Studies, Department of Chemical & Biological Engineering, Rensselaer Polytechnic Institute, Troy, NY 12180.

<sup>‡</sup>Sterile Product Development, Merck Research Laboratories, Summit NJ 07901

<sup>±</sup>Analytical Characterization, Merck Research Laboratories, Union NJ 07083

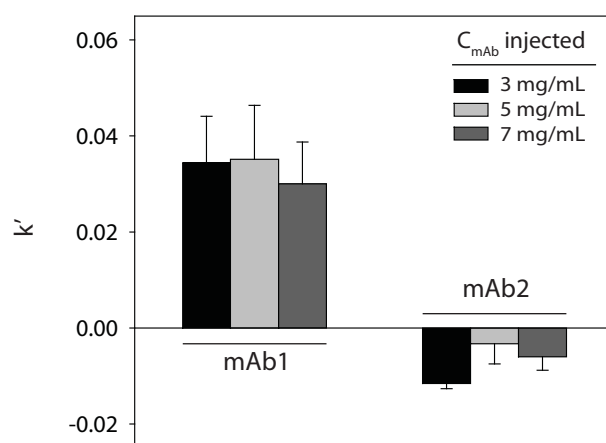

**FIGURE S1. Effect of injection concentration on antibody retention.** mAb1 and mAb2 were buffer-exchanged to pH 4.4 and 50 mM NaCl, and injected at concentrations of 3, 5 and 7 mg/mL into columns with immobilized antibody.
